# Supplementary material for: Efficient photocatalytic CO2 reduction coupled with selective styrene oxidation over a modified g-C3N4/BiOBr composite with high atom economy
Source: Royal Society of Chemistry journal article supplement (doi:10.1039/d3gc03872f), 2024-01-01
Supplement: d3gc03872f1.pdf [file d3gc03872f1.pdf]

## Supplementary Information

# Efficient Photocatalytic CO<sub>2</sub> Reduction Coupled with Selective Styrene Oxidation over Modified g-C<sub>3</sub>N<sub>4</sub>/BiOBr Composite with High Atom Economy

*Peng Bai,<sup>a,b</sup> Yicheng Zhao,<sup>a,b\*</sup> Yongdan Li<sup>c</sup>*

<sup>a</sup>State Key Laboratory of Chemical Engineering (Tianjin University), Tianjin Key Laboratory of Applied Catalysis Science and Technology, School of Chemical Engineering and Technology, Tianjin University, Tianjin, 300072, China

<sup>b</sup>Collaborative Innovation Center of Chemical Science and Engineering (Tianjin), Tianjin, 300072, China

<sup>c</sup>Department of Chemical and Metallurgical Engineering, Aalto University, Kemistintie 1, FI-00076 Aalto, Finland

\*Email: zhaoyicheng@tju.edu.cn

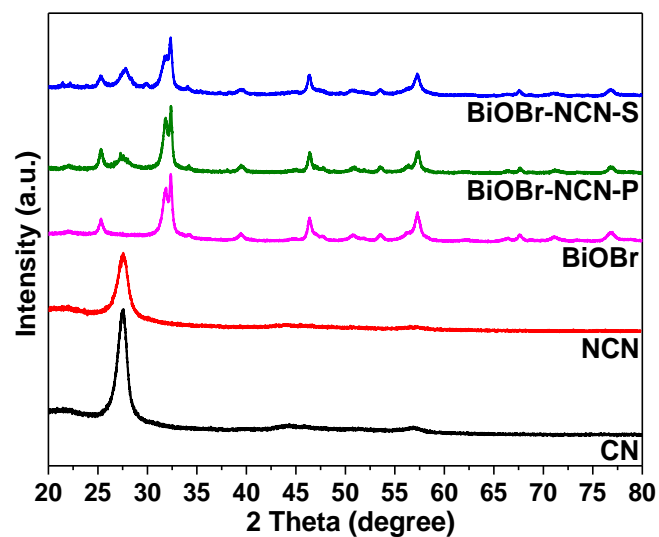

Fig. S1 XRD patterns of the samples.

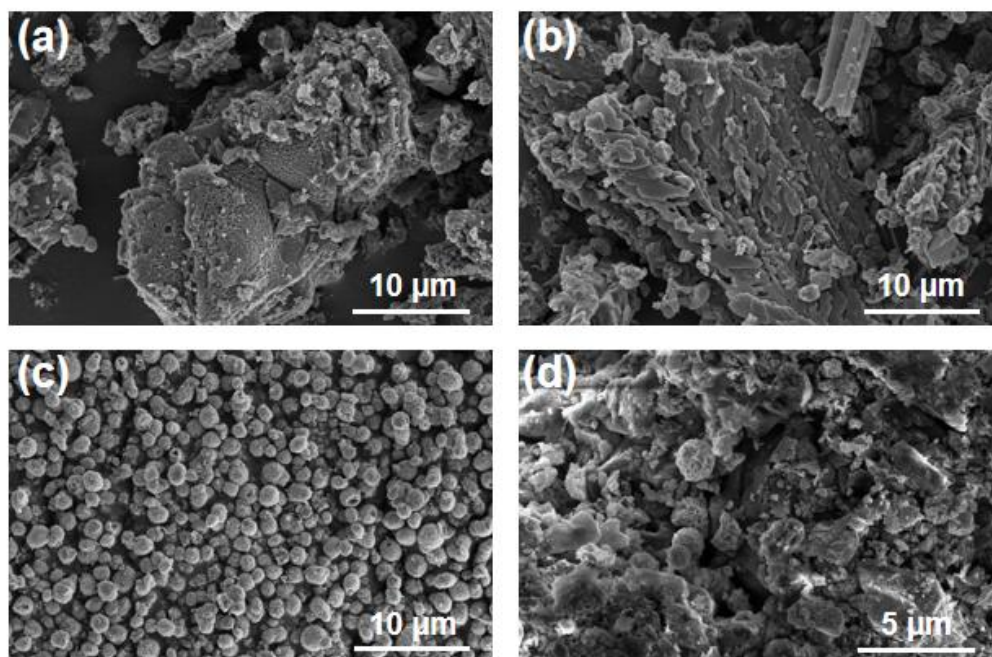

Fig. S2 SEM images of (a) CN, (b) NCN, (c) BiOBr and (d) BiOBr-NCN-S.

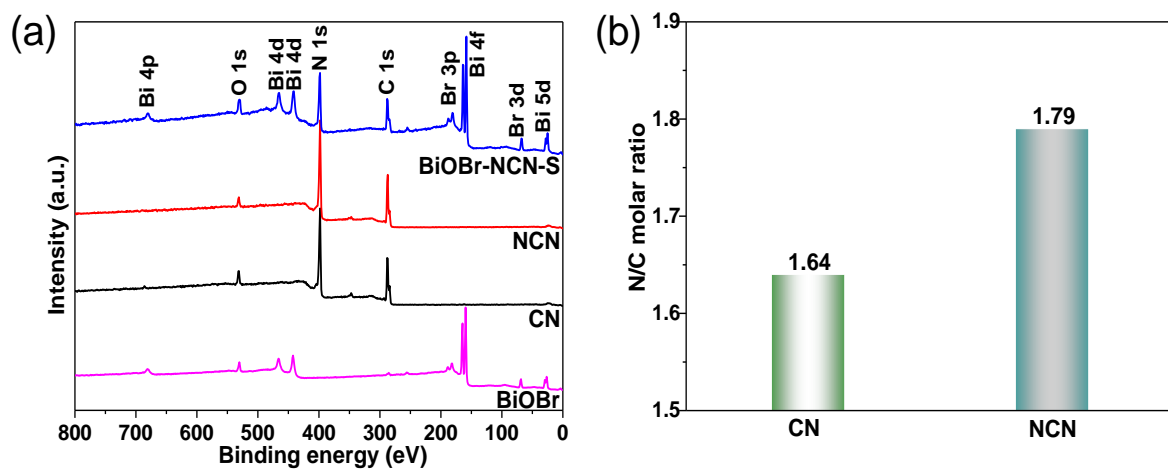

**Fig. S3** (a) XPS survey spectra of the samples. (b) N/C molar ratio on the surface of CN and NCN based on the XPS results.

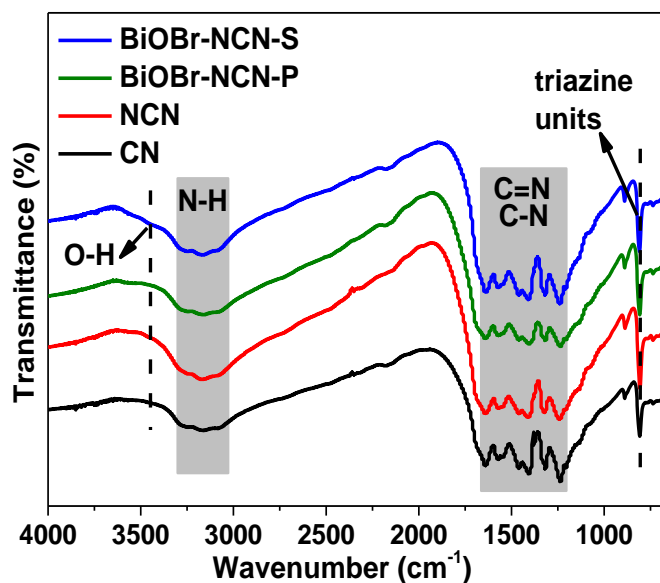

Fig. S4 FTIR spectra of the samples.

The strong sharp peak at  $810\text{ cm}^{-1}$  corresponds to the vibration of triazine units of CN. The pronounced absorption in  $1230\text{-}1640\text{ cm}^{-1}$  is attributed to the stretching vibration of CN heterocycles including  $\text{sp}^2$  C=N stretching vibrations and out-of-plane bending modes of  $\text{sp}^3$  C-N bonds. The broad band in  $3050\text{-}3300\text{ cm}^{-1}$  is related to residual N-H components. Compared with CN, a stronger band at  $3050\text{-}3300\text{ cm}^{-1}$  of NCN indicates more uncondensed amino groups, demonstrating that the carbocyclic structure of CN is partially destroyed after the modification with  $\text{NH}_4\text{Cl}$ . Moreover, a new weak absorption peak at about  $3450\text{ cm}^{-1}$  is found in the result of BiOBr-NCN-S, which is ascribed to the O-H bond of hydroxyl groups adsorbed on the oxygen vacancies, indicating that more oxygen vacancies are formed on the surface of BiOBr-NCN-S.

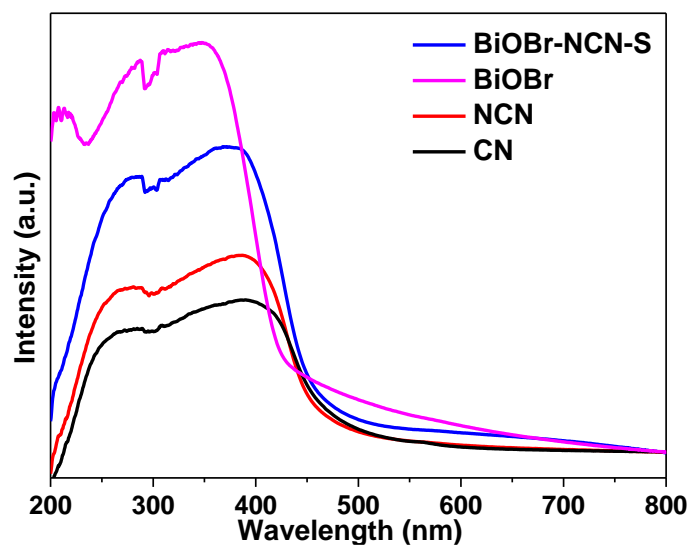

**Fig. S5** UV-vis absorption spectra of the samples.

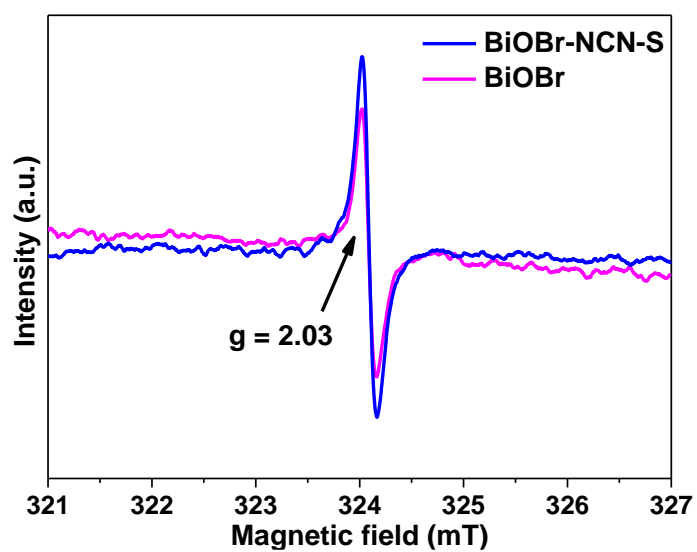

**Fig. S6** EPR spectra for the detection of oxygen defects in BiOBr and BiOBr-NCN-S.

The characteristic peaks at  $g = 2.03$  are assigned to the oxygen defects.

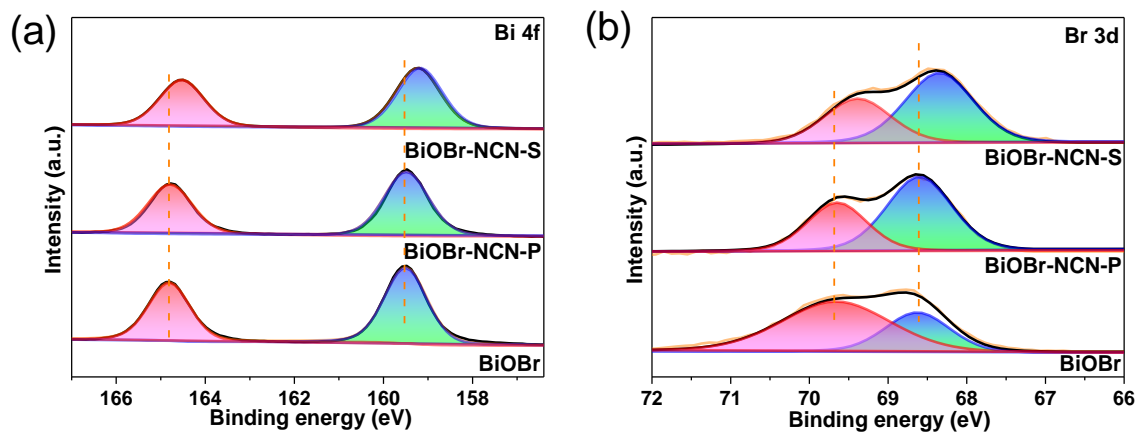

**Fig. S7** High-resolution XPS spectra of (a) Bi 4f and (b) Br 3d of various photocatalysts.

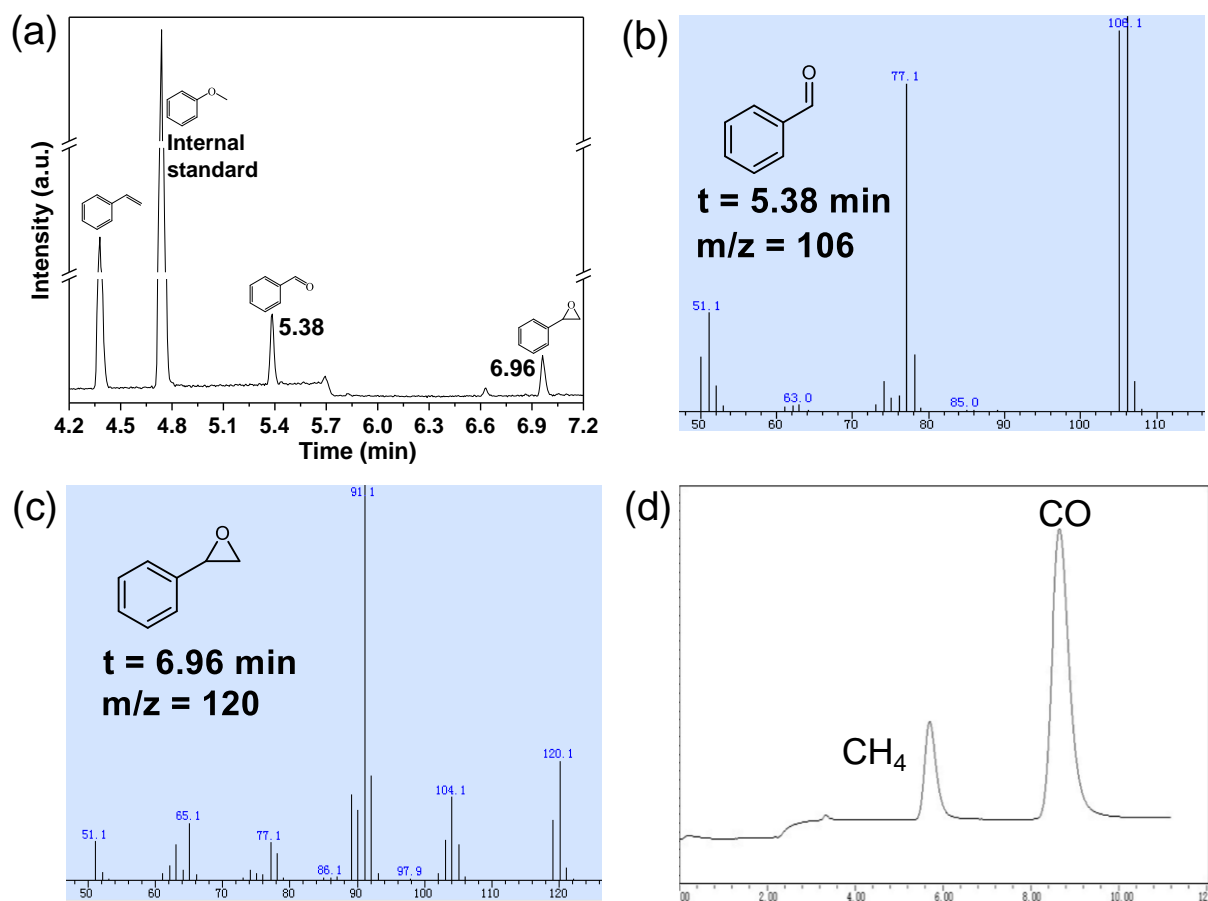

**Fig. S8** (a) GC analysis results of styrene oxidation products. Only benzaldehyde (BD) and styrene oxide (SO) products are generated in the liquid phase. (b, c) GC-MS analysis results of BD and SO products. (d) GC analysis results of  $\text{CO}_2$  reduction products.

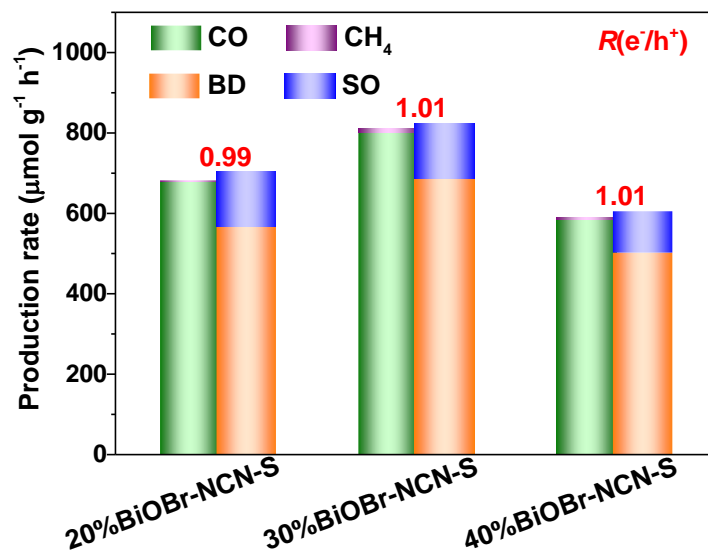

**Fig. S9** Photocatalytic redox performance of the catalysts with various BiOBr contents.

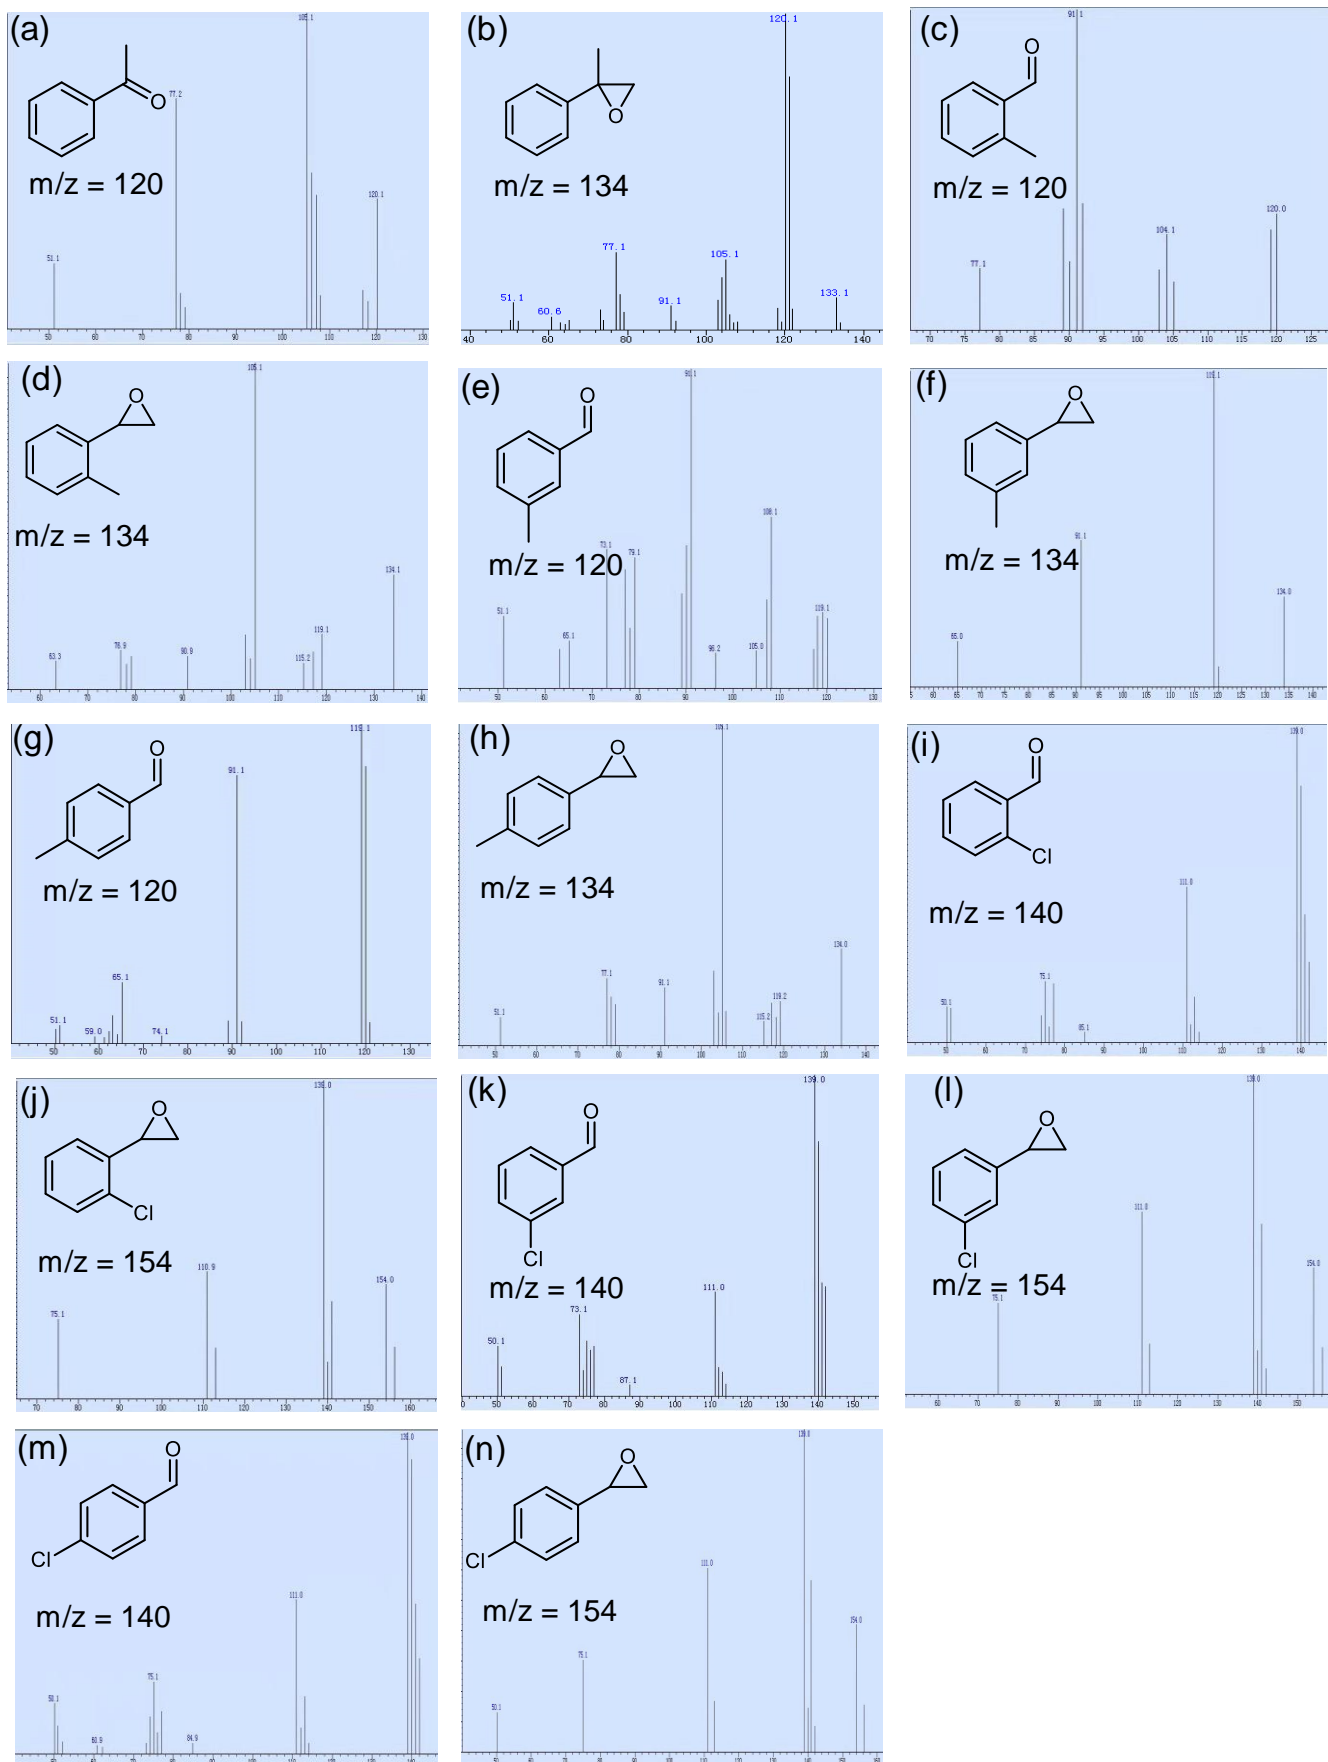

**Fig. S10** GC-MS analysis results of oxidation products.



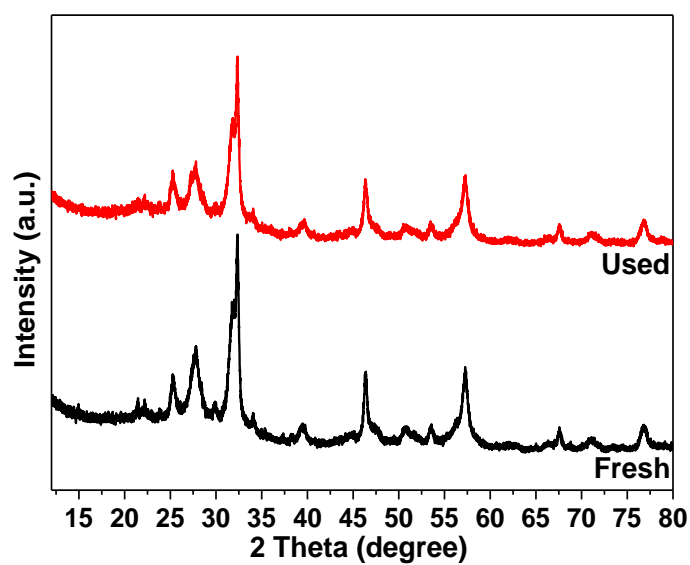

**Fig. S11** XRD patterns of the BiOBr-NCN-S sample before and after reaction.

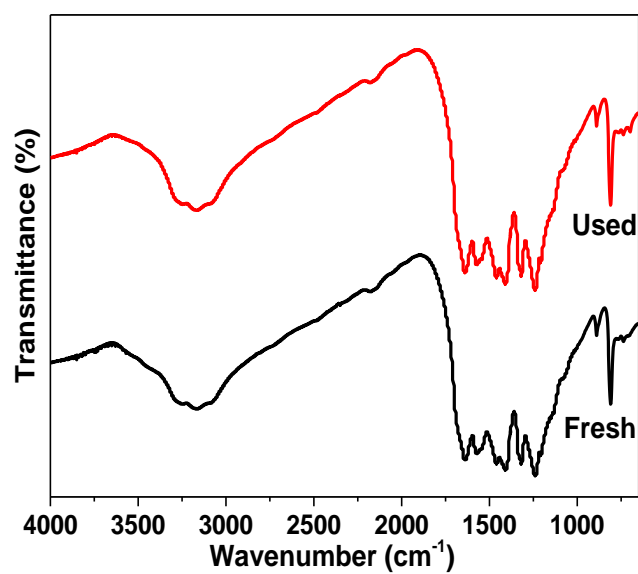

**Fig. S12** FTIR spectra of the BiOBr-NCN-S sample before and after reaction.

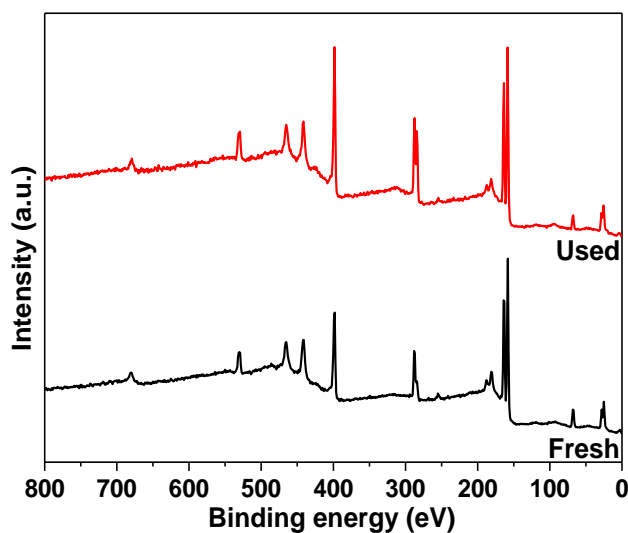

**Fig. S13** XPS survey spectra of the BiOBr-NCN-S sample before and after reaction.

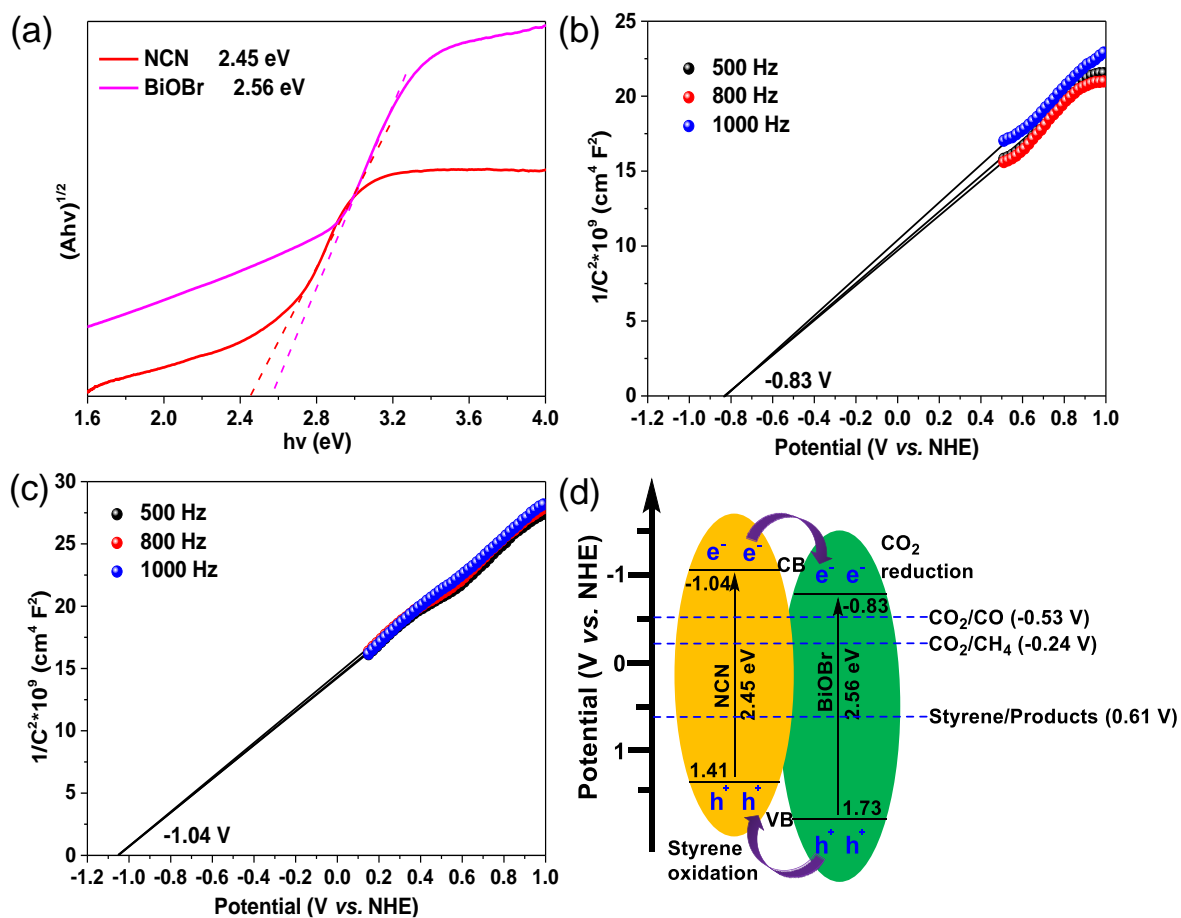

**Fig. S14** (a) The plots of  $(Ah\nu)^{1/2}$  versus photon energy for NCN and BiOBr. Mott-schottky plots of (b) BiOBr and (c) NCN under different frequencies. (d) Schematic band structure evolution of BiOBr-NCN-S composite.

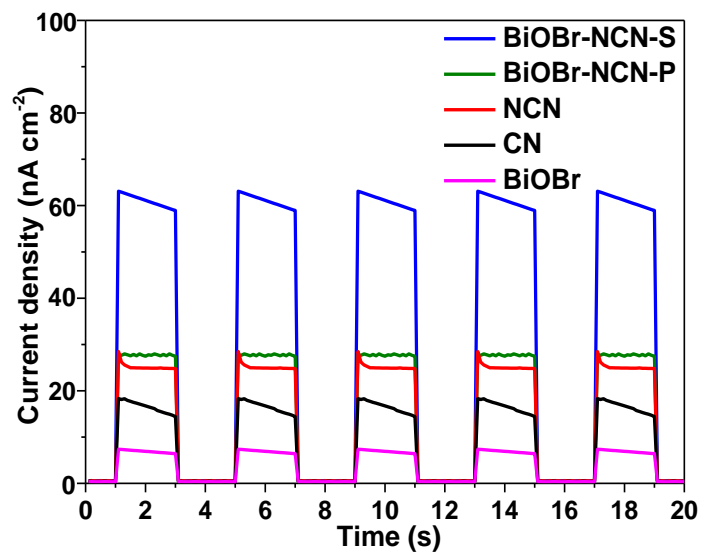

Fig. S15 Photocurrent responses of different samples.

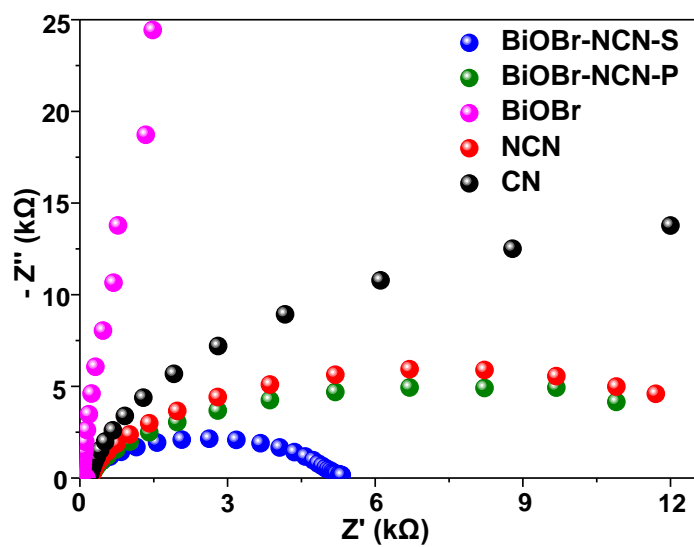

Fig. S16 EIS curves of different samples.

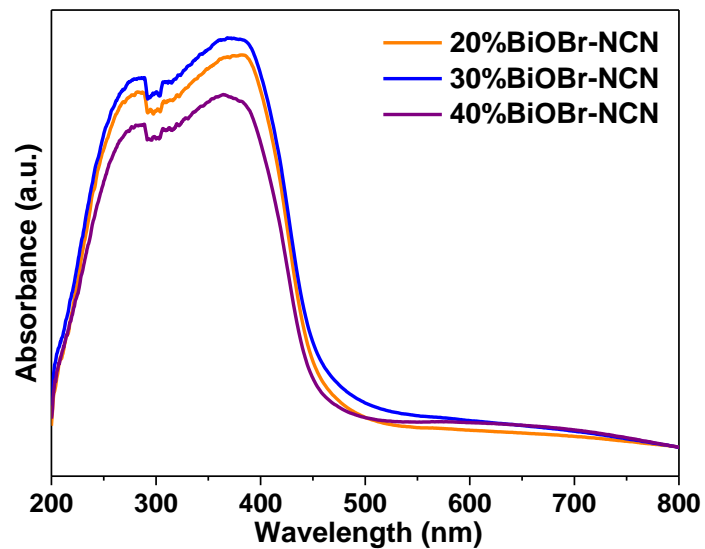

Fig. S17 UV-vis absorption of the catalysts with various BiOBr contents.

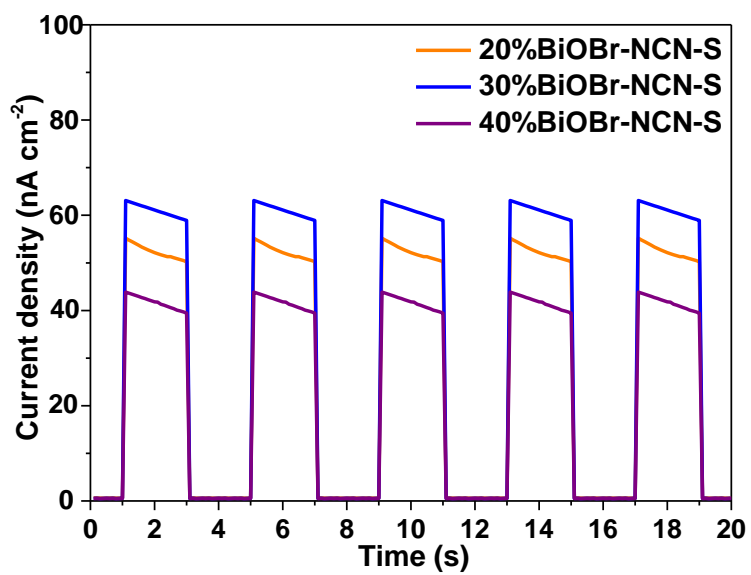

Fig. S18 Photocurrent responses of the catalysts with various BiOBr contents.

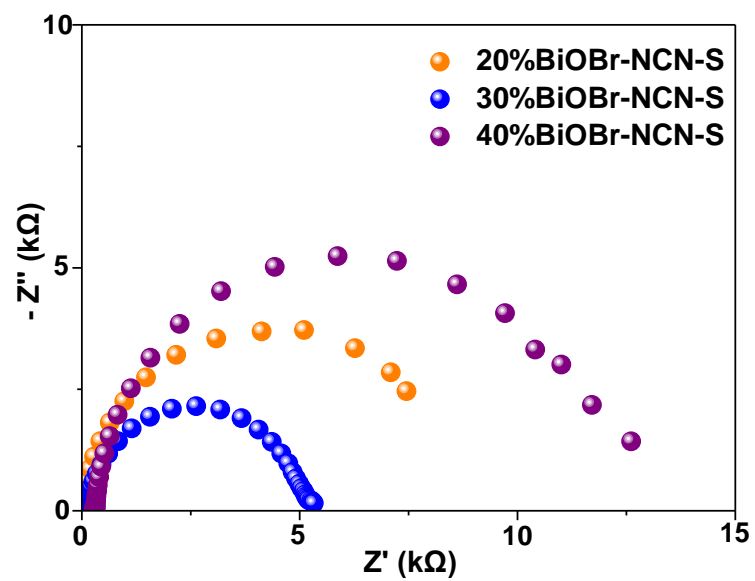

Fig. S19 EIS curves of the catalysts with various BiOBr contents.

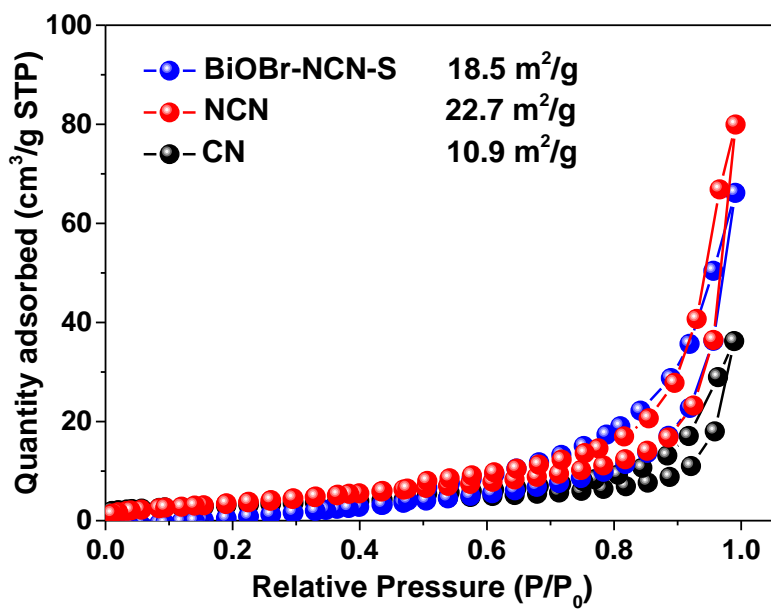

Fig. S20 N<sub>2</sub> adsorption isotherms of CN, NCN and BiOBr-NCN-S.

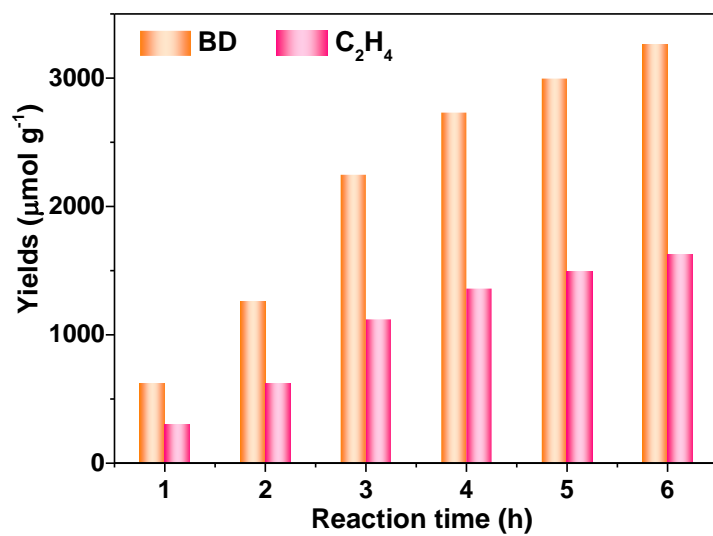

**Fig. S21** Time-yield plots of the BD and C<sub>2</sub>H<sub>4</sub> over BiOBr-NCN-S.

**Table S1.** The results of elemental analysis.

| Sample | Atomic content (%) |      |      | Atomic ratio<br>of N/C |
|--------|--------------------|------|------|------------------------|
|        | N                  | C    | H    |                        |
| CN     | 49.5               | 32.5 | 18.0 | 1.52                   |
| NCN    | 48.8               | 32.3 | 18.9 | 1.51                   |

**Table S2.** Representative summary of photocatalytic CO<sub>2</sub> reduction to CO.

| Catalyst                                                                               | photosensitizer                        | Sacrificial agent | Reducing reagent | CO yield ( $\mu\text{mol g}^{-1} \text{h}^{-1}$ ) | CO selectivity | AQE    | Ref.      |
|----------------------------------------------------------------------------------------|----------------------------------------|-------------------|------------------|---------------------------------------------------|----------------|--------|-----------|
| BiOBr-NCN-S                                                                            | None                                   | None              | SE               | 802                                               | 96.2%          | 1.26%  | This work |
| BiOBr-NCN-S                                                                            | None                                   | None              | H <sub>2</sub> O | 59                                                | 90.2%          | 0.21%  | This work |
| Cu-SAEB <sup>a</sup>                                                                   | None                                   | None              | H <sub>2</sub> O | 236                                               | >99.0%         | 1.49%  | 1         |
| Cu <sub>2</sub> S@R <sub>OH</sub> -NiCo <sub>2</sub> O <sub>3</sub> DSNBs <sup>b</sup> | [Ru(bpy) <sub>3</sub> ]Cl <sub>2</sub> | TEOA              | H <sub>2</sub> O | 7067                                              | 72.0%          | 1.01%  | 2         |
| MAF-34-CoRu <sup>c</sup>                                                               | None                                   | None              | H <sub>2</sub> O | 11                                                | 100.0%         | 0.015% | 3         |
| Cu/CN-0.25                                                                             | None                                   | None              | H <sub>2</sub> O | 11                                                | 59.3%          | 1.32%  | 4         |
| 3DOM CdSQD/NC <sup>d</sup>                                                             | bipyridine/CoCl <sub>2</sub>           | None              | BA <sup>f</sup>  | 5210                                              | 89.6%          | 2.9%   | 5         |
|                                                                                        | 2                                      |                   |                  |                                                   |                |        |           |
| Pt/C/CdS@ZnIn <sub>2</sub> S <sub>4</sub> /CoO <sub>x</sub>                            | None                                   | None              | H <sub>2</sub> O | 329                                               | 88.6%          | 0.34%  | 6         |
| In@Mo <sub>2</sub> C-d <sup>e</sup>                                                    | None                                   | TEA               | H <sub>2</sub> O | 234                                               | 97.3%          | 7.2%   | 7         |
| Co-Bi <sub>3</sub> O <sub>4</sub> Br-1                                                 | None                                   | None              | H <sub>2</sub> O | 107.1                                             | 99.4%          | 0.91%  | 8         |

<sup>a</sup> Cu-SAEB: N-Cu<sub>1</sub>-S single-atom electron bridge. <sup>b</sup> Cu<sub>2</sub>S@R<sub>OH</sub>-NiCo<sub>2</sub>O<sub>3</sub> DSNBs: double-shelled nanoboxes, with an outer shell of hydroxy-rich nickel cobaltite nanosheets and an inner shell of Cu<sub>2</sub>S. <sup>c</sup> MAF-34-CoRu: [Co<sub>3</sub>Ru<sub>4</sub>(ip)<sub>12</sub>]Cl<sub>2</sub>. <sup>d</sup> 3DOM CdSQD/NC: 3D ordered macroporous N-doped carbon (NC) supported CdS quantum dots. <sup>e</sup> d: annealed in H<sub>2</sub>/Ar (5%) at 600 °C for 3 h. <sup>f</sup> Benzylamine. CO selectivity (%) = 2n(CO)/[2n(CO) + 8n(CH<sub>4</sub>) + 2n(H<sub>2</sub>)].



**Table S3.** Representative summary of photocatalytic CO<sub>2</sub> reduction coupled with organic selective oxidation.

| Catalyst                                                          | Solvent          | Substrate                                                                           | Oxidation product(s)<br>(Yield(s) / $\mu\text{mol g}^{-1} \text{h}^{-1}$ )                                                                                                                                                                                                        | Reduction product(s)<br>(Yield(s) / $\mu\text{mol g}^{-1} \text{h}^{-1}$ ) | Ref.      |
|-------------------------------------------------------------------|------------------|-------------------------------------------------------------------------------------|-----------------------------------------------------------------------------------------------------------------------------------------------------------------------------------------------------------------------------------------------------------------------------------|----------------------------------------------------------------------------|-----------|
| BiOBr-NCN-S                                                       | Acetonitrile     | 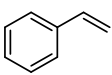   |  <br>(684) (139)                                                                                               | CO<br>CH <sub>4</sub><br>(802) (8)                                         | This work |
| g-CN/POM/[Re] <sup>a</sup>                                        | Acetonitrile     |    |  <br>(12) (11)                                                                                                  | CO<br>(21)                                                                 | 9         |
| Ag-TiO <sub>2</sub>                                               | Acetonitrile     |    | <br>(33)                                                                                                                                                                                         | CH <sub>3</sub> OH<br>(9)                                                  | 10        |
| Cu <sub>2</sub> O/Cu                                              | Acetonitrile     |  | <br>(117)                                                                                                                                                                                      | CO<br>HCOOH<br>(0.7) (3)                                                   | 11        |
| Cu <sub>2</sub> O-RGO/BiVO <sub>4</sub> <sup>b</sup>              | Acetonitrile     |  | <br>(9)                                                                                                                                                                                        | HCOOH<br>(3)                                                               | 12        |
| FAPbBr <sub>3</sub> /Bi <sub>2</sub> WO <sub>6</sub> <sup>c</sup> | Trifluorotoluene |  | <br>(250)                                                                                                                                                                                      | CO<br>(170)                                                                | 13        |
| CTAB-ZnIn <sub>2</sub> S <sub>4</sub> <sup>d</sup>                | Acetonitrile     |  | <br>(211)<br> <br>(469) | CO<br>(38)                                                                 | 14        |

**(Table S3, Continued)**

| Catalyst            | Solvent      | Substrate                                                                         | Oxidation product(s)<br>(Yield(s) / $\mu\text{mol g}^{-1} \text{h}^{-1}$ )                  | Reduction product(s)<br>(Yield(s) / $\mu\text{mol g}^{-1} \text{h}^{-1}$ ) | Ref. |
|---------------------|--------------|-----------------------------------------------------------------------------------|---------------------------------------------------------------------------------------------|----------------------------------------------------------------------------|------|
| Cu/TiO <sub>2</sub> | Acetonitrile | 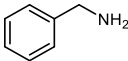 | <br>(1120) | CH <sub>3</sub> OH<br>(84)                                                 | 15   |
| Pd/TiO <sub>2</sub> | gas phase    | C <sub>2</sub> H <sub>6</sub>                                                     | C <sub>2</sub> H <sub>4</sub><br>(230)                                                      | CO<br>(120)                                                                | 16   |

<sup>a</sup> g-CN/POM/[Re]: g-C<sub>3</sub>N<sub>4</sub>/H<sub>3</sub>PW<sub>12</sub>O<sub>40</sub>/Re<sub>2</sub>(bipyNNH<sub>2</sub>bipy)(CO)<sub>6</sub>Cl<sub>2</sub>. <sup>b</sup> RGO: Reduced graphene oxide. <sup>c</sup> FAPbBr<sub>3</sub>: Formamidinium lead bromide. <sup>d</sup> CTAB: Cetyl trimethyl ammonium bromide.

**Table S4.** Representative summary of photocatalytic styrene oxidation.

| Oxidant                       | Solvent                         | Catalyst                                                    | Yield ( $\mu\text{mol g}^{-1} \text{h}^{-1}$ ) |      |     |                 | Ref.      |
|-------------------------------|---------------------------------|-------------------------------------------------------------|------------------------------------------------|------|-----|-----------------|-----------|
|                               |                                 |                                                             | BD                                             | SO   | CO  | CH <sub>4</sub> |           |
| CO <sub>2</sub>               | Acetonitrile                    | BiOBr-NCN-S                                                 | 684                                            | 139  | 802 | 8               | This work |
| O <sub>2</sub>                | Acetonitrile                    | UiO-66-NH <sub>2</sub> @MIL-101(Fe)                         | 225                                            | -    | -   | -               | 17        |
| H <sub>2</sub> O <sub>2</sub> | Acetonitrile                    | PAN/Ag NPs/g-C <sub>3</sub> N <sub>4</sub> NFs <sup>a</sup> | 980                                            | 1838 | -   | -               | 18        |
| O <sub>2</sub>                | n-Hexane                        | CsPbBr <sub>3</sub> /Cs <sub>4</sub> PbBr <sub>6</sub>      | 1098                                           | -    | -   | -               | 19        |
| O <sub>2</sub>                | Tetrahydrofuran                 | Au/TiO <sub>2</sub> + RuCl <sub>3</sub> ·xH <sub>2</sub> O  | -                                              | 813  | -   | -               | 20        |
| O <sub>2</sub>                | Acetonitrile + H <sub>2</sub> O | BBT <sup>b</sup>                                            | 430                                            | -    | -   | -               | 21        |
| Air                           | N,N-dimethylformamide           | BiC <sub>3</sub> N <sub>3</sub> S <sub>3</sub>              | 274                                            | 1251 | -   | -               | 22        |

<sup>a</sup> PAN/Ag NPs/g-C<sub>3</sub>N<sub>4</sub> NFs: Polyacrylonitrile/Ag nanoparticles/g-C<sub>3</sub>N<sub>4</sub> nanofibers. <sup>b</sup> BBT: triethynylbenzene benzothiodiazole.

**Table S5.** The photocatalytic selective oxidation of different aromatic olefins coupled with CO<sub>2</sub> reduction over BiOBr-NCN-S catalyst <sup>a</sup>.

| Substrate<br><b>A</b>                                                               | Products<br><b>B</b> <b>C</b>                                                       |                                                                                     | Yields (μmol g <sup>-1</sup> ) |          |           |                       |
|-------------------------------------------------------------------------------------|-------------------------------------------------------------------------------------|-------------------------------------------------------------------------------------|--------------------------------|----------|-----------|-----------------------|
|                                                                                     | <b>B</b>                                                                            | <b>C</b>                                                                            | <b>B</b>                       | <b>C</b> | <b>CO</b> | <b>CH<sub>4</sub></b> |
| 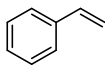   |    |    | 6636                           | 1356     | 7658      | 81                    |
|    |    |    | 7080                           | 1618     | 8374      | 83                    |
|    |    |    | 4020                           | 1120     | 4982      | 38                    |
|    |    |    | 5454                           | 1266     | 6484      | 61                    |
|   |   |   | 8088                           | 1932     | 9564      | 112                   |
|  |  |  | 4308                           | 858      | 4956      | 69                    |
|  |  |  | 5094                           | 1048     | 5882      | 63                    |
|  |  |  | 6090                           | 1232     | 6984      | 84                    |

<sup>a</sup> Reaction condition: 0.1 mmol substrate, 5 mg BiOBr-NCN-S catalyst, in 5 mL acetonitrile, CO<sub>2</sub> atmosphere (0.1 MPa), 6 h, 25 °C, under Xe lamp irradiation.

## References

- 1 G. Wang, Y. Wu, Z. Li, Z. Lou, Q. Chen, Y. Li, D. Wang, and J. Mao, *Angew. Chem. Int. Ed.*, 2023, **62**, e2022184.
- 2 L. Li, X. Dai, D. Chen, Y. Zeng, Y. Hu, and X. Lou, *Angew. Chem. Int. Ed.*, 2022, **61**, e2022058.
- 3 N. Huang, J. Shen, X. Zhang, P. Liao, J. Zhang, and X. Chen, *J. Am. Chem. Soc.*, 2022, **144**, 8676-8682.
- 4 J. Wang, T. Heil, B. Zhu, C. Tung, J. Yu, H. Chen, M. Antonietti, and S. Cao, *ACS Nano*, 2020, **14**, 8584-8593.
- 5 F. Wang, T. Hou, X. Zhao, W. Yao, R. Fang, K. Shen, and Y. Li, *Adv. Mater.*, 2021, **33**, 2102690.
- 6 X. Zhang, P. Wang, X. Lv, X. Niu, X. Lin, S. Zhong, D. Wang, H. Lin, J. Chen, and S. Bai, *ACS Catal.*, 2022, **12**, 2569-2580.
- 7 S. Gong, Y. Niu, X. Teng, X. Liu, M. Xu, C. Xu, T. Meyer, and Z. Chen, *Appl. Catal. B Environ.*, 2022, **310**, 121333.
- 8 J. Di, C. Chen, S. Yang, S. Chen, M. Duan, J. Xiong, C. Zhu, R. Long, W. Hao, Z. Chi, H. Chen, Y. Weng, J. Xia, L. Song, S. Li, H. Li, and Z. Liu, *Nat. Commun.*, 2019, **10**, 2840.
- 9 H. Yu, E. Haviv, and R. Neumann, *Angew. Chem. Int. Ed.*, 2020, **59**, 6219-6223.
- 10 L. Wang, X. Zhang, L. Yang, C. Wang, and H. Wang, *Catal. Sci. Technol.*, 2015, **5**, 4800-4805.
- 11 Y. Chen, M. Wang, Y. Ma, Y. Li, J. Cai, and Z. Li, *Catal. Sci. Technol.*, 2018, **8**, 2218-2223.
- 12 X. Li, D. Wei, L. Ye, and Z. Li, *Inorg. Chem. Commun.*, 2019, **104**, 171-177.
- 13 H. Huang, J. Zhao, Y. Du, C. Zhou, M. Zhang, Z. Wang, Y. Weng, J. Long, J. Hofkens, J. Steele, and M. Roeyfaers, *ACS Nano*, 2020, **14**, 16689-16697.
- 14 L. Yuan, Y. Li, Z. Tang, J. Gong, and Y. Xu, *J. Catal.*, 2020, **390**, 244-250.
- 15 T. Yang, Q. Yu, and H. Wang, *Catal. Lett.*, 2018, **148**, 2382-2390.
- 16 R. Zhang, H. Wang, S. Tang, C. Liu, F. Dong, H. Yue, and B. Liang, *ACS Catal.*, 2018, **8**, 9280-9286.
- 17 L. Liu, L. Zhang, F. Wang, K. Qi, H. Zhang, X. Cui, and W. Zheng, *Nanoscale*, 2019, **11**, 7554-7559.
- 18 A. Shah, A. Sharma, V. Sharma, and N. Shimpi, *ACS Appl. Nano Mater.*, 2020, **3**, 1922-1933.

- 19 P. Qiu, Q. Wang, Y. Zhao, Y. Dai, Y. Dong, C. Chen, Q. Chen, and Y. Li, *Front. Chem.*, 2020, **8**, 130.
- 20 A. Graml, and B. König, *ChemPhotoChem*, 2021, **5**, 362-368.
- 21 C. Ayed, L. Silva, D. Wang and K. Zhang, *J. Mater. Chem. A*, 2018, **6**, 22145-22151.
- 22 Q. Wang, X. Deng, W. Chen, P. Chen, F. Liu, and S. Yin, *Fuel*, 2021, **302**, 121127.
